# Supplementary material for: Mineralogical, petrological, and geochemical characterisation of chrysotile, amosite and crocidolite asbestos mine waste from Southern Africa in context of risk assessment and rehabilitation
Source: Preprints.org preprint supplement (doi:10.20944/preprints202310.0277.v1), 2023-10-05
Supplement: Supplementary file 3 [file supplementary]

Supplementary Materials: Mineralogical, Petrological, and Geochemical Characterisation of Chrysotile, Amosite and Crocidolite Asbestos Mine Waste From Southern Africa in Context of Risk Assessment and Re-habilitation

Jessica Schapira, Robert Bolhar, Sharad Master and Allan H. Wilson


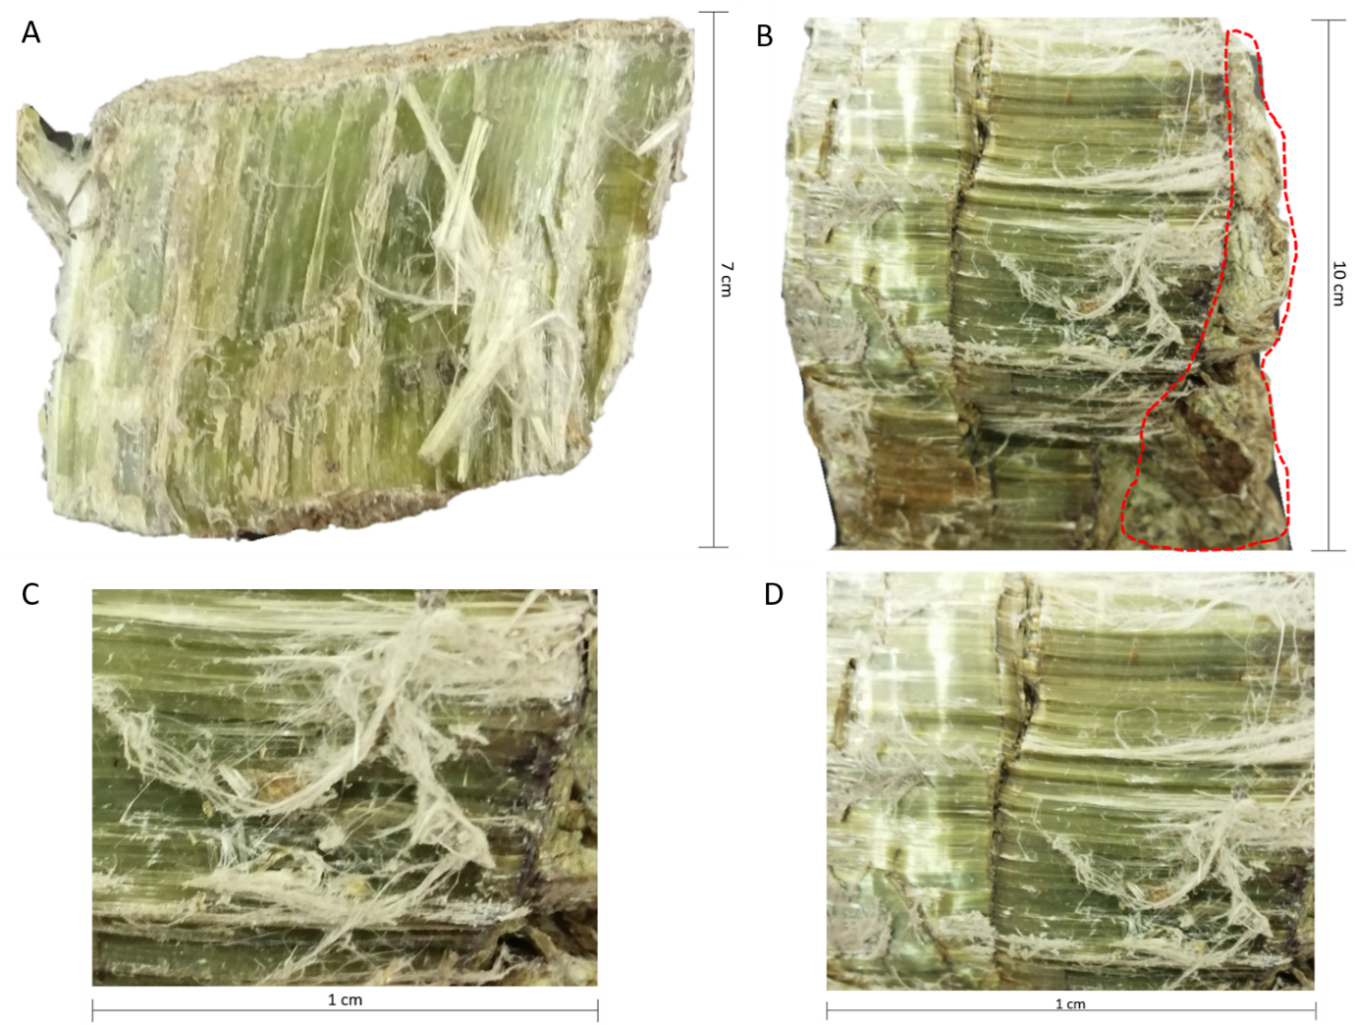


**Figure S1.** Sample Ch1. (A) Chrysotile rock sample; (B) length of fibres spanning the width of the veins; (C) shows individual masses of matted white, silky fibres and (D) a parting at the centre of the vein width halving the length of the cross-vein fibres.


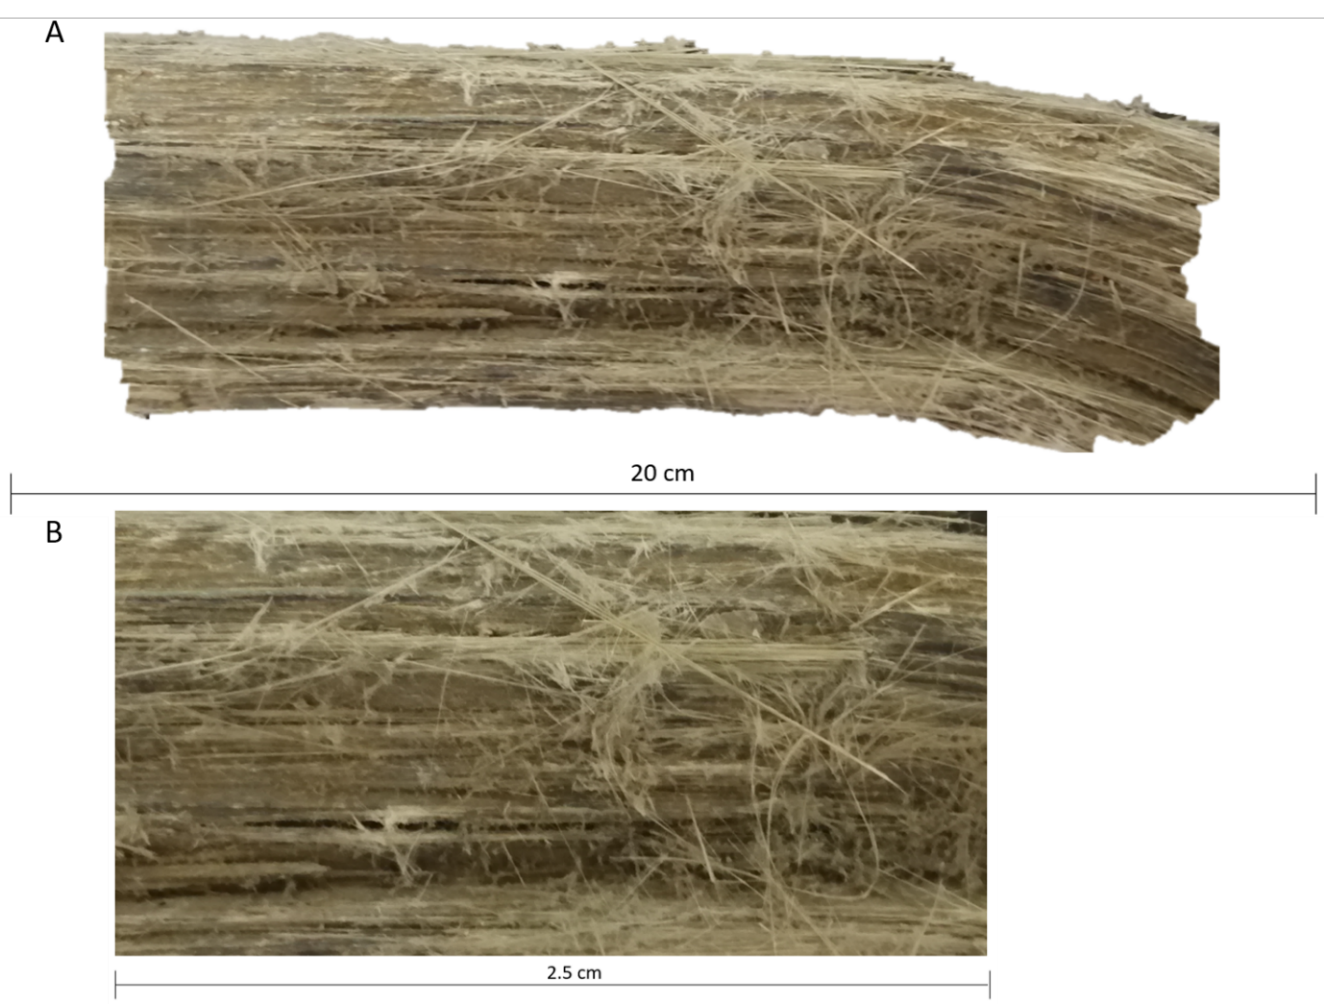


**Figure S2.** Sample Am2. (A) Amosite rock sample and (B) matted and splintery fibres.


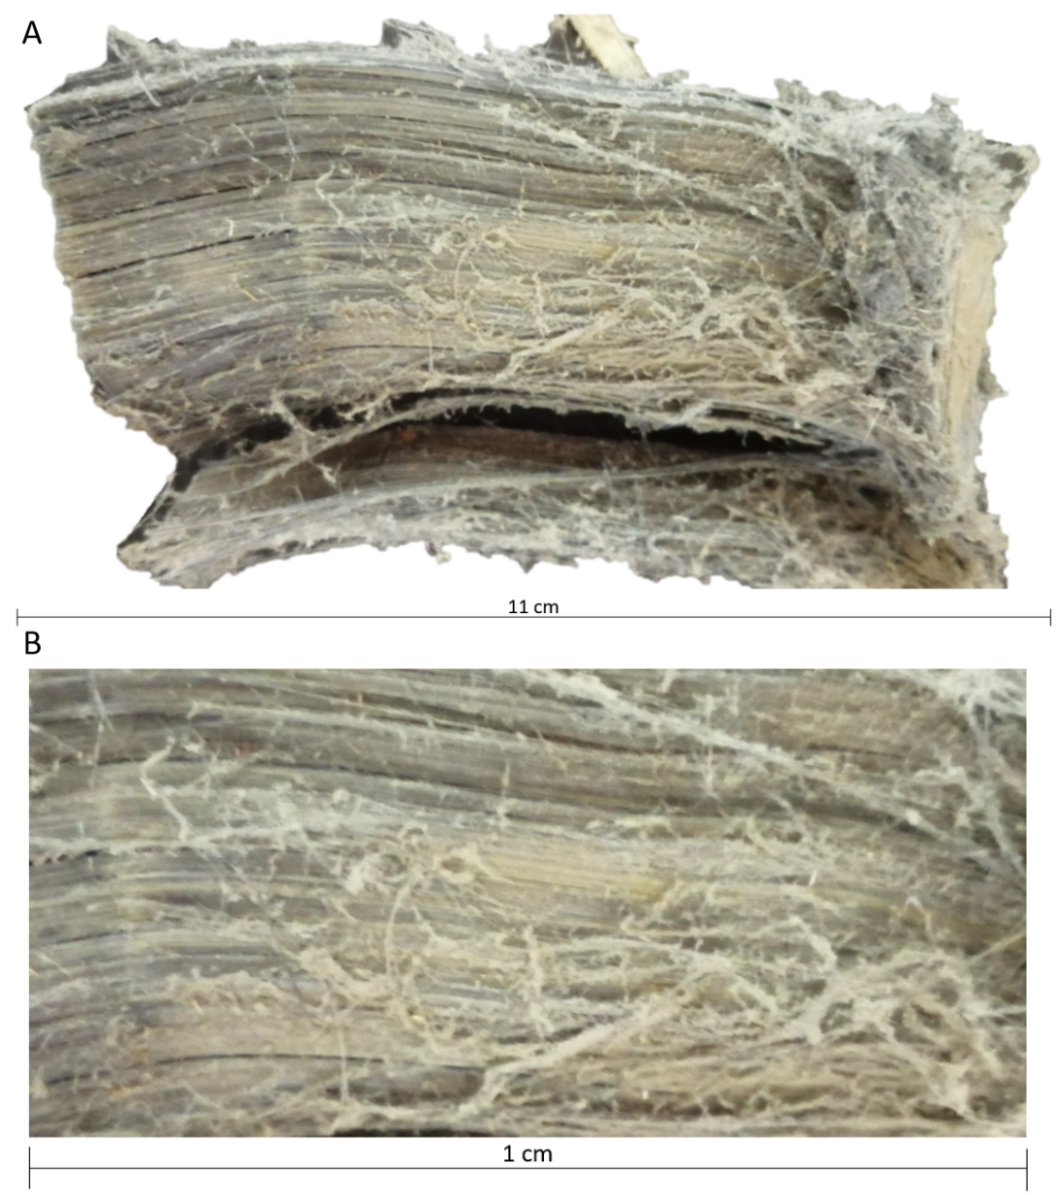


**Figure S3.** Sample Cr3. (A) Crocidolite rock sample and (B) showing slight curvature of poly-filamentous bundles.


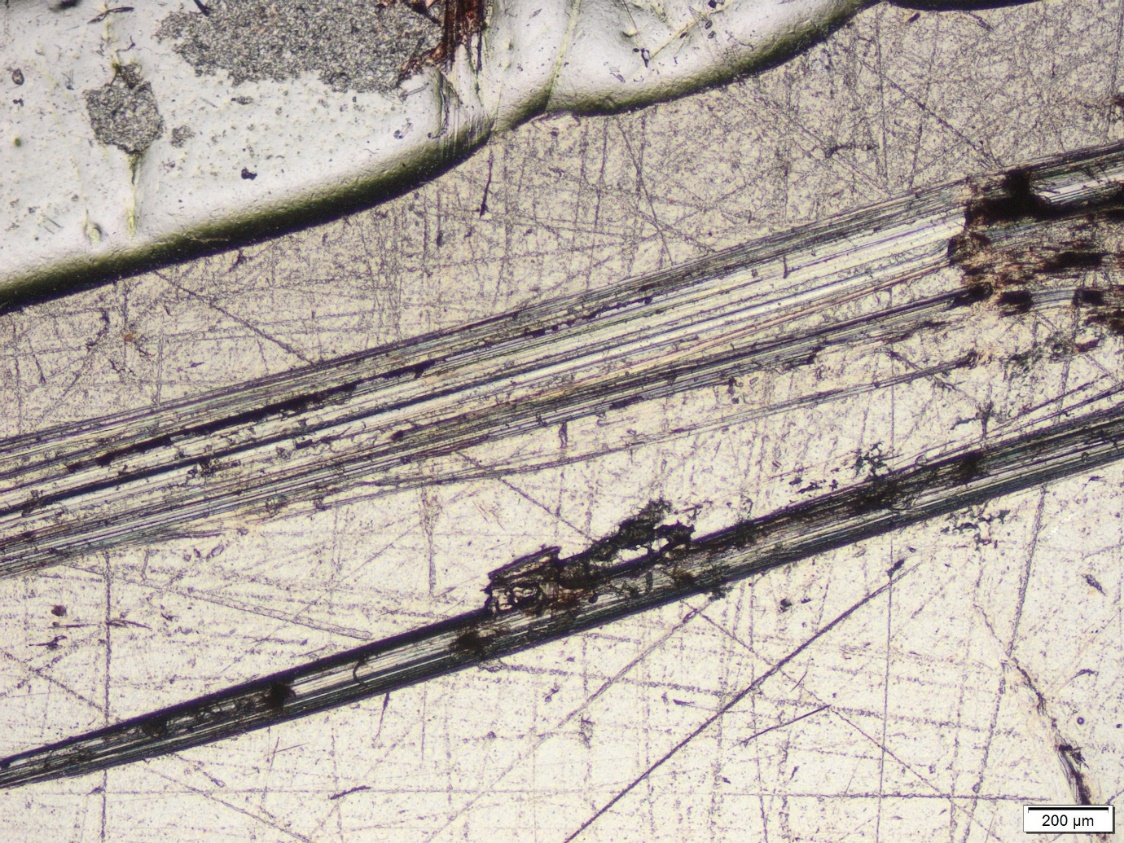


**Figure S4.** Sample Ch1. Chrysotile fibre bundle (PPL). Notice the break in the bundle in the top right.


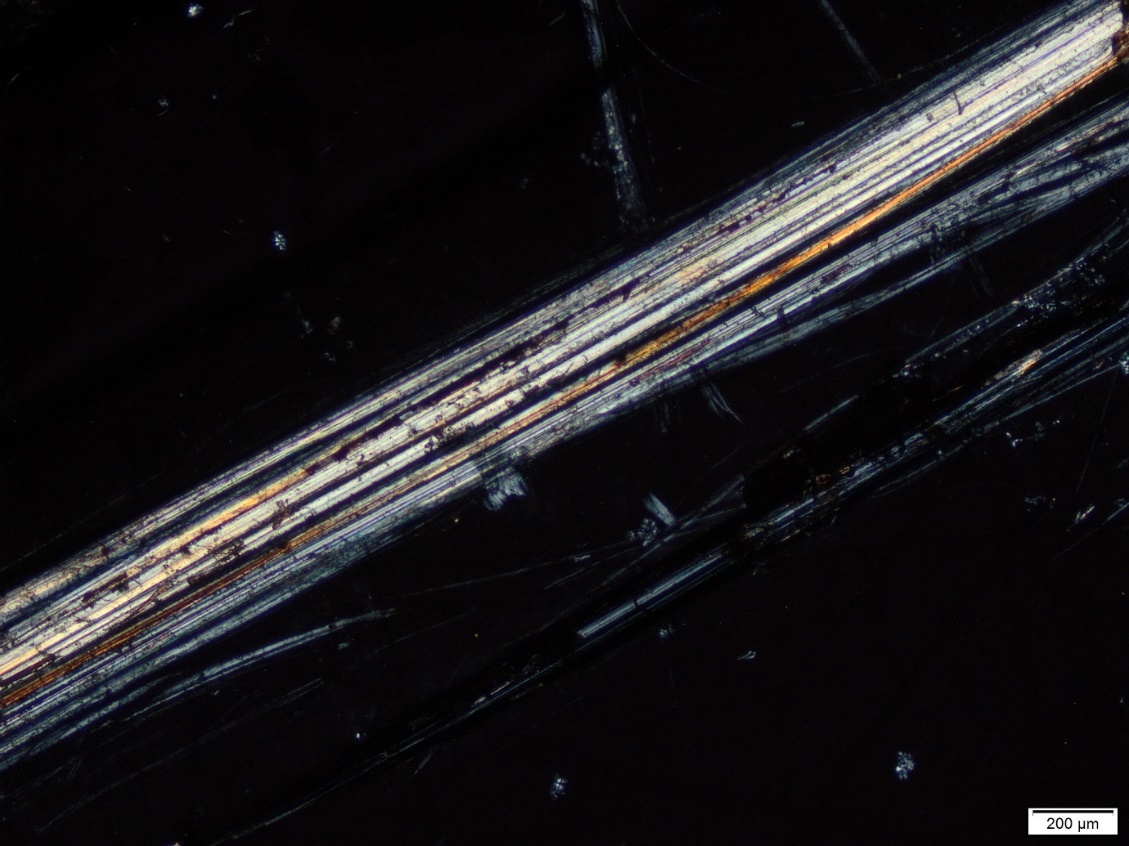


**Figure S5.** Sample Ch1. Chrysotile fibre bundle (XPL).


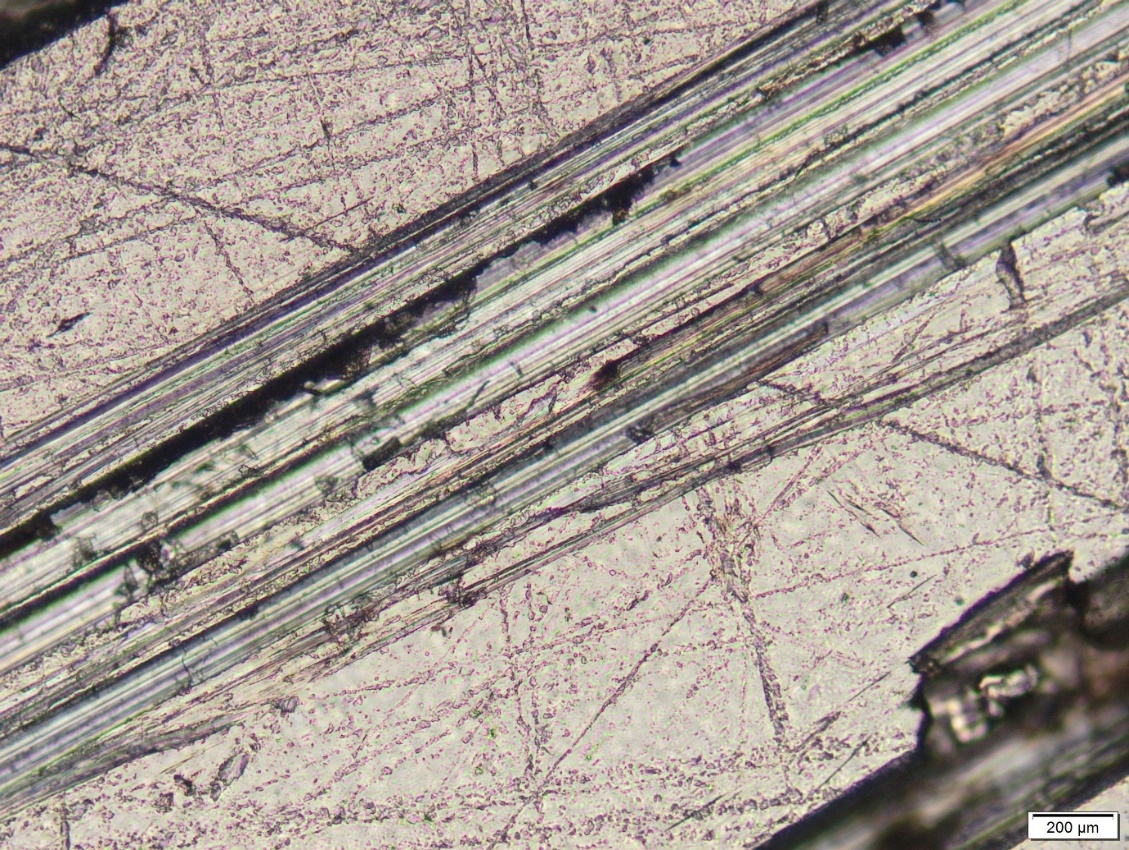


**Figure S6.** Sample Ch1. Partially altered chrysotile fibres shown by amorphous, irregular material and cloudiness (PPL).


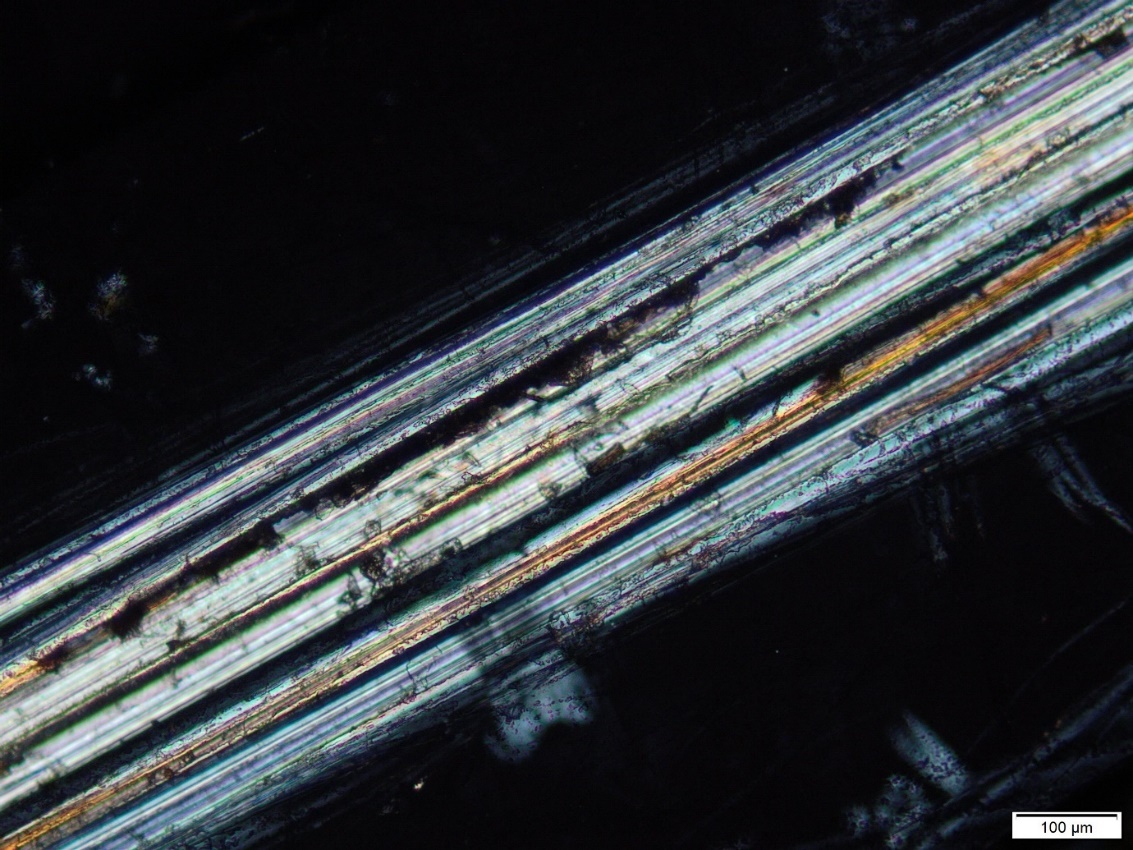


**Figure S7.** Sample Ch1. Partially altered chrysotile fibres shown by amorphous, irregular material and cloudiness (XPL).


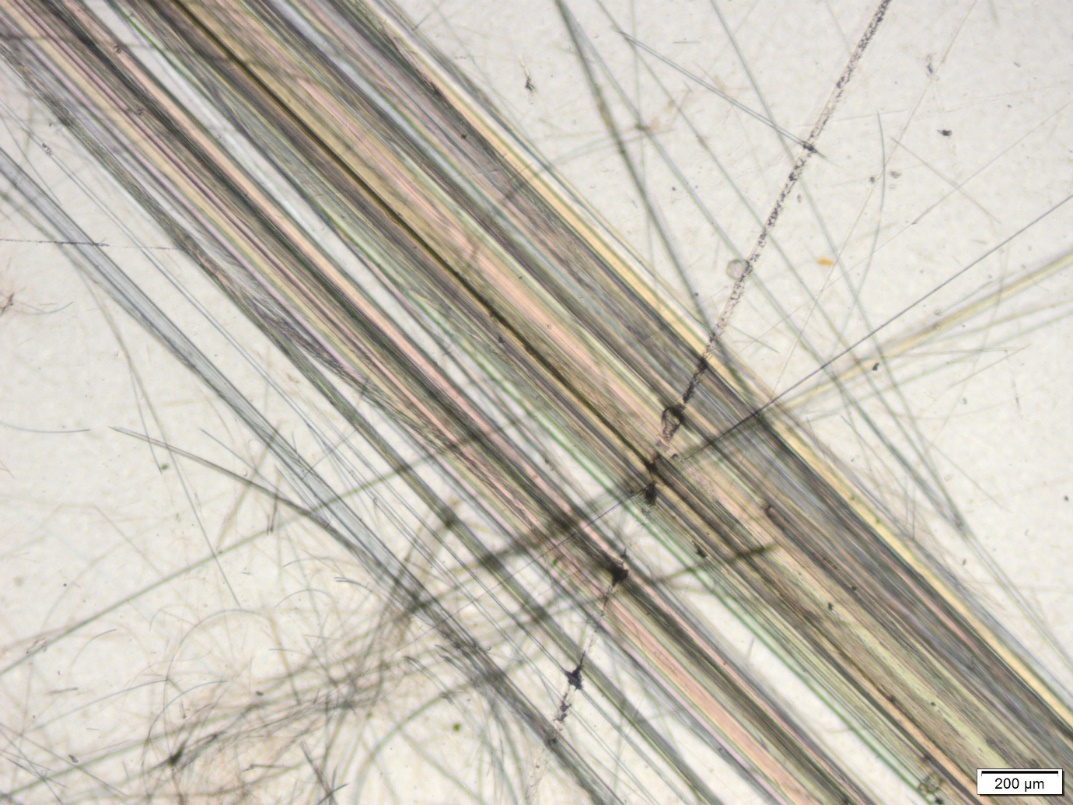


**Figure S8.** Sample Am2. Extremely fine amosite fibres showing parallel alignment and matting (PPL).


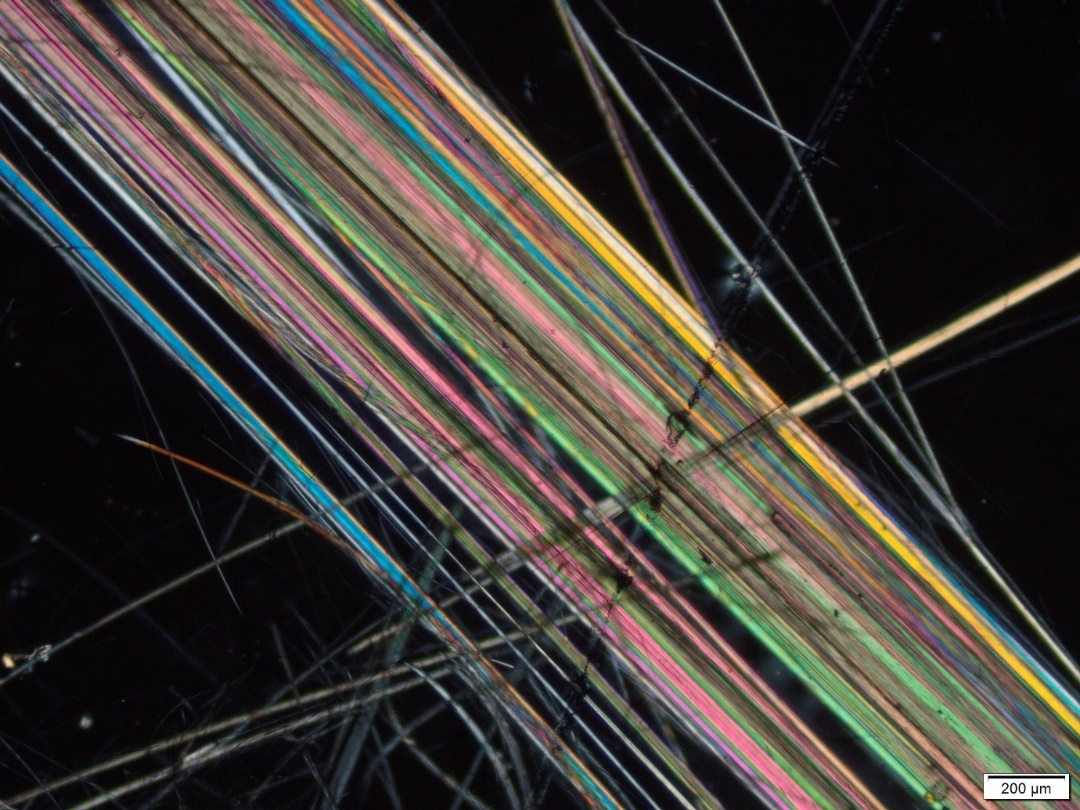


**Figure S9.** Sample Am2. Extremely fine amosite fibres showing parallel alignment and matting (XPL).


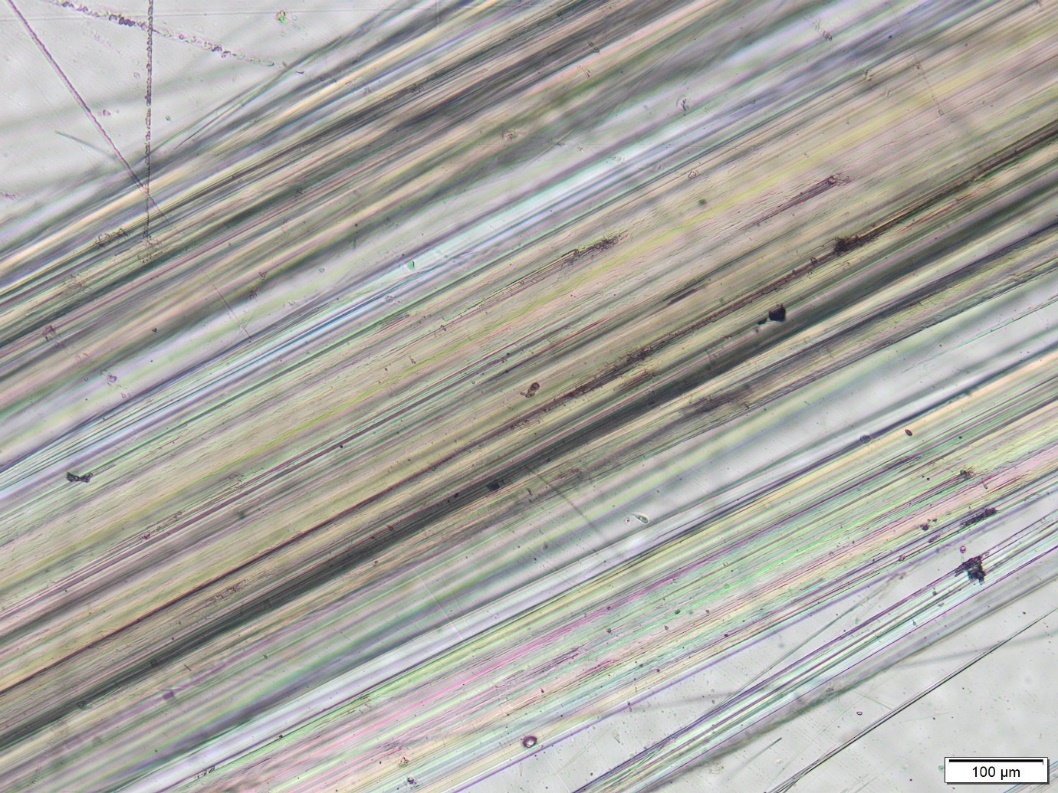


**Figure S10.** Sample Am2. Amosite fibres at maximum angle of pleochroism showing heterogenous colours (PPL).


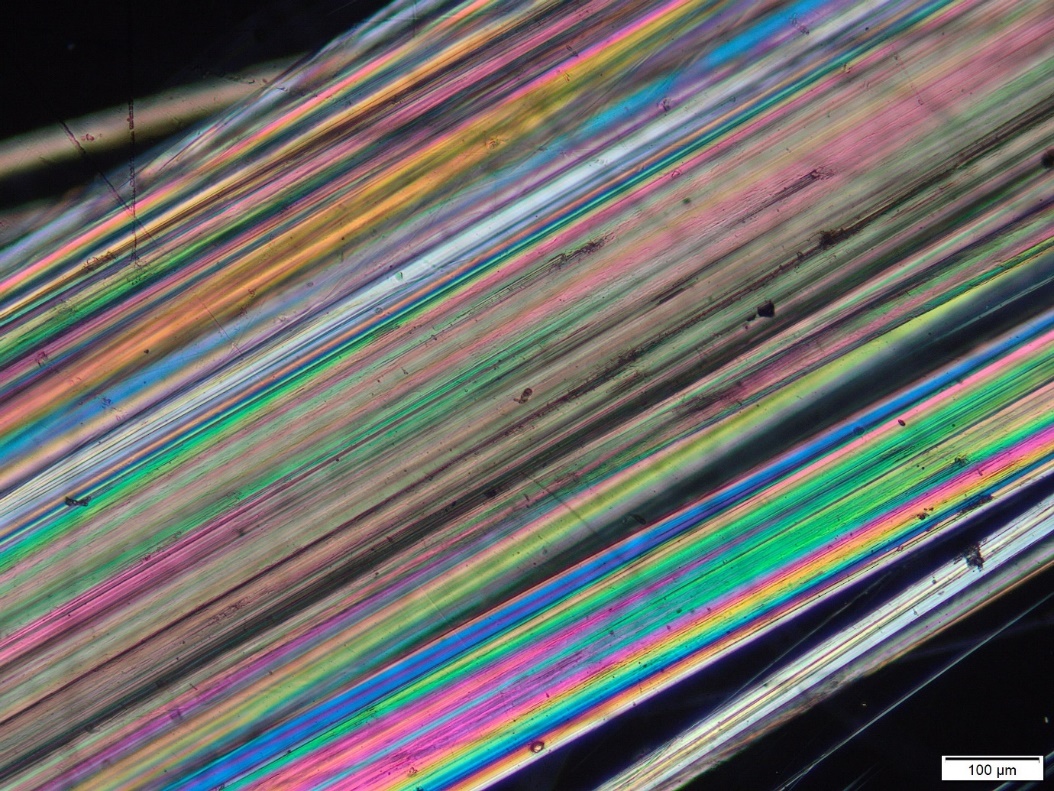


**Figure S11.** Sample Am2. Amosite fibres at maximum angle of birefringence showing heterogenous interference colours (XPL).


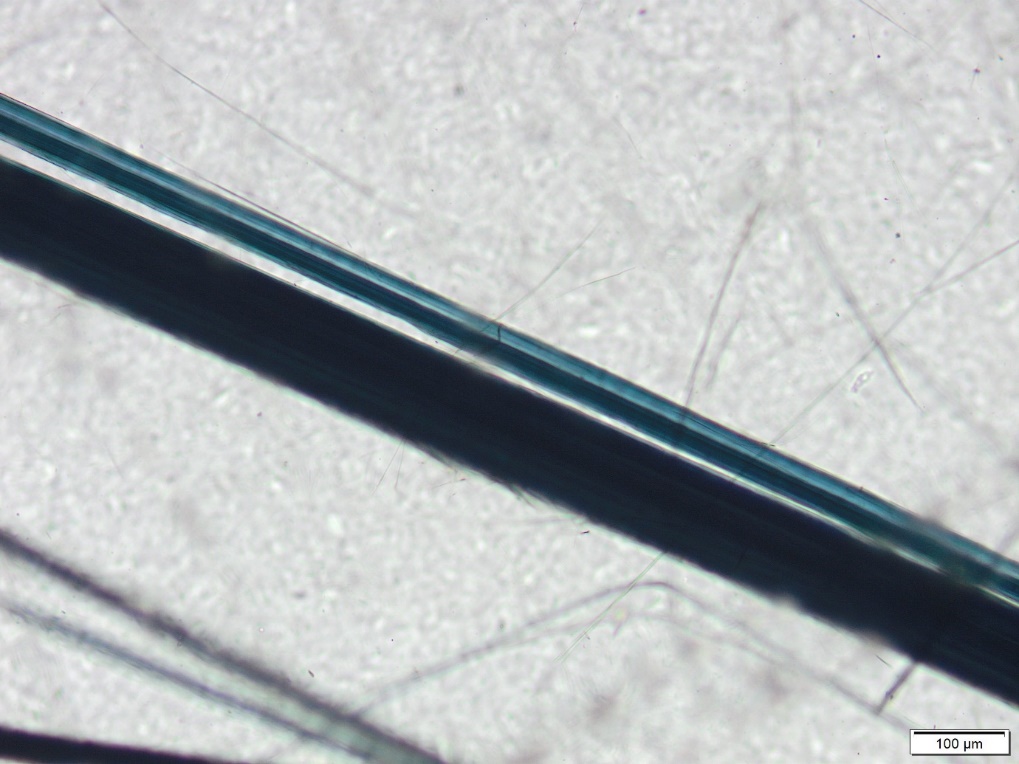


**Figure S12.** Sample Cr3. Poly-filamentous crocidolite (PPL).


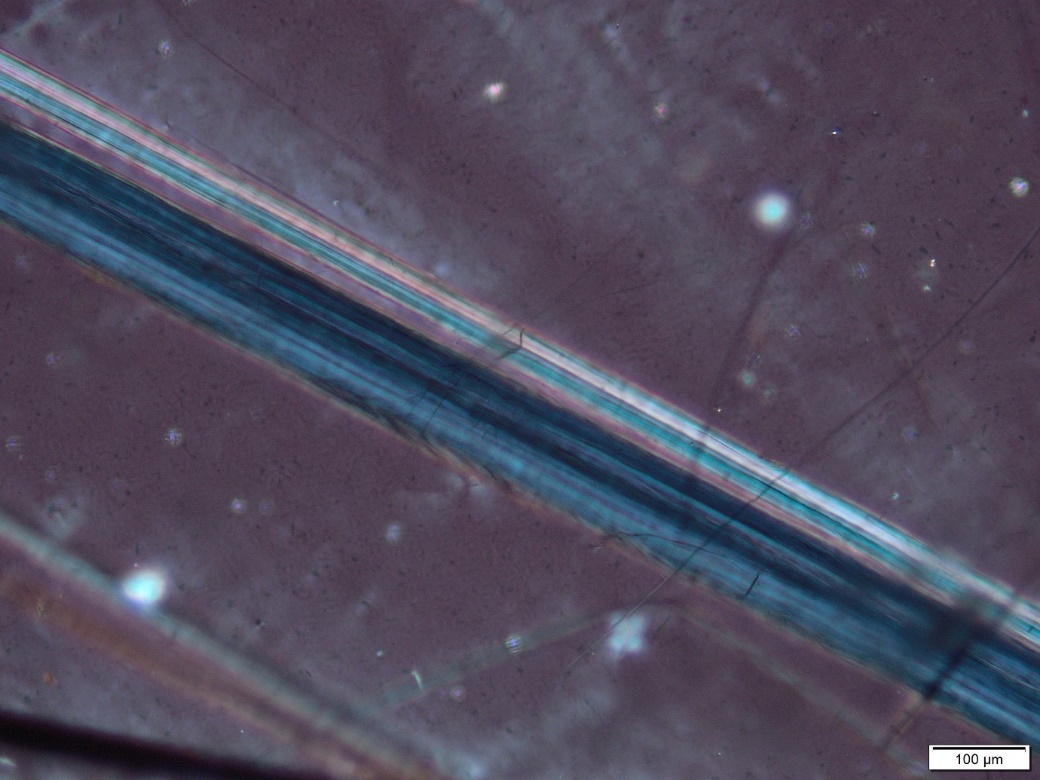


**Figure S13.** Sample Cr3. Poly-filamentous crocidolite (XPL).


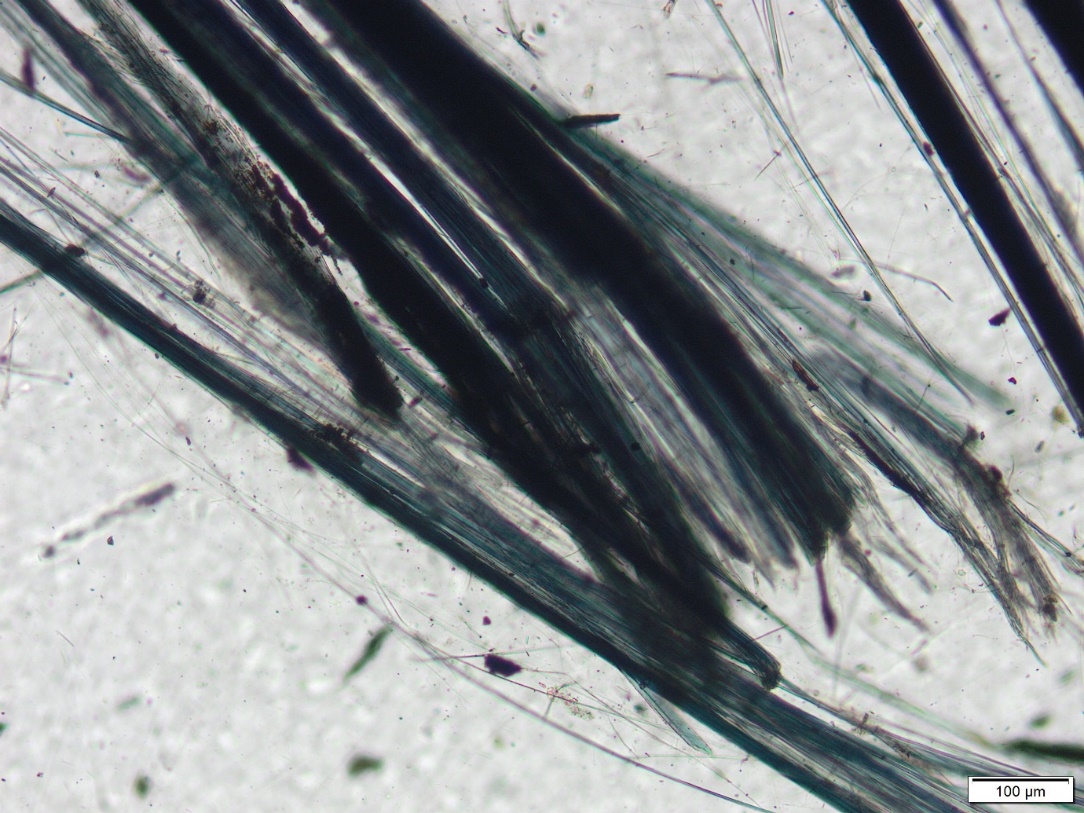


**Figure S14.** Sample Cr3. Crocidolite fibres with splayed ends (PPL).


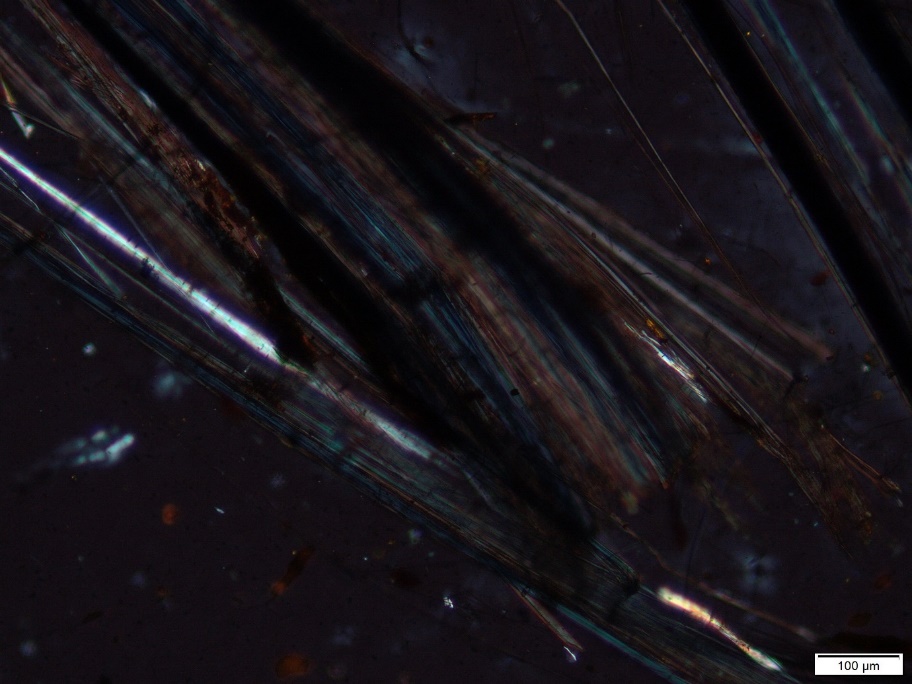


**Figure S15.** Sample Cr3. Crocidolite fibres with splayed ends (XPL).

**Graph S1:** Sample Ch1**.** Chrysotile asbestos XRD diffractogram and Rietveld refinement phases .

**Graph S2:** Sample Am2.Amosite asbestos XRD diffractogram and Rietveld refinement phases .

**Graph S3:** Sample Cr3**.** Crocidolite asbestos XRD diffractogram and Rietveld refinement phases .

**Table S1.** The values of 2 and intensity (I) recorded for each the peaks of each phase from the X-Ray Diffraction record (λ (Co*K*α) = 1.78892).

| **Peak #** | Chrysotile rock sample | | Amosite rock sample | | | | | | Crocidolite rock sample | |
| --- | --- | --- | --- | --- | --- | --- | --- | --- | --- | --- |
|  |  | | Amosite (grunerite) | | Quartz low | | Sepiolite | |  | |
|  | Intensity (counts) | Position [°2Ɵ] (Cobalt (Co)) | Intensity (counts) | Position [°2Ɵ] (Cobalt (Co)) | Intensity (counts) | Position [°2Ɵ] (Cobalt (Co)) | Intensity (counts) | Position [°2Ɵ] (Cobalt (Co)) | Intensity (counts) | Position [°2Ɵ] (Cobalt (Co)) |
| 1 | **15000** | 14 | 4500 | 11 | **4500** | 31 | 2000 | 4.5 | 3000 | 11.5 |
| 2 | 3000 | 22.5 | **9500** | 12 | 2200 | 59 | **3150** | 6.5 | **20000** | 12.5 |
| 3 | 6500 | 23.5 | 4000 | 30 |  |  |  |  | 1000 | 20 |
| 4 | 4000 | 26.5 | 4500 | 31.5 |  |  |  |  | 3000 | 21 |
| 5 | 8000 | 28.5 | 6100 | 33.8 |  |  |  |  | 1500 | 27 |
| 6 | 2900 | 31 | 2000 | 35 |  |  |  |  | 1800 | 28.5 |
| 7 | 2000 | 36 | 7100 | 38 |  |  |  |  | 6000 | 30.5 |
| 8 | 1200 | 39 | 5200 | 41.5 |  |  |  |  | 2500 | 32 |
| 9 | 3000 | 40 | 3100 | 45.5 |  |  |  |  | 12000 | 33.5 |
| 10 | 3100 | 42 | 4000 | 48 |  |  |  |  | 9500 | 38.5 |

**Table S2.** BET surface area report.

|  | **Rock Sample** | | |
| --- | --- | --- | --- |
| **BET Surface Area Report** | **Chrysotile** | Amosite | Crocidolite |
| BET SSA (m2/g) | 29.6746 0.1572 | 10.2856 0.0535 | 18.9009 0.1048 |
| Slope (g/cm3 STP) | 0.145628 0.000768 | 0.421158 0.002177 | 0.229281 0.001263 |
| Y-intercept (g/cm3 STP) | 0.001070 0.000116 | 0.002074 0.000329 | 0.001035 0.000191 |
| C | 137.071472 | 204.057744 | 222.422981 |
| Qm (cm3/g STP) | 6.8167 | 2.3628 | 4.3418 |
| Correlation coefficient | 0.9998330 | 0.9998398 | 0.9998180 |
| Molecular cross-sectional area (nm2) | 0.1620 | 0.1620 | 0.1620 |
| STP – Standard temperature and pressure | | | |

**Table S3.** The dissolved mass fraction (DMF) calculated for the asbestos samples.

| **Time (hours)** | **Chrysotile** | **Amosite** | **Crocidolite** |
| --- | --- | --- | --- |
| 0 | 0 | 0 | 0 |
| 24 | 0.5 | 0.22 | 0.25 |
| 48 | 0.52 | 0.23 | 0.33 |
| 168 | 0.58 | 0.27 | 0.35 |
| 334 | 0.63 | 0.29 | 0.37 |
| 720 | 0.67 | 0.292 | 0.38 |
